# Supplementary material for: Performance Assessment of Composite Skirted Ground Reinforcement System in Liquefiable Ground Under Repeated Dynamic Loading Conditions
Source: Research Square preprint supplement (doi:10.21203/rs.3.rs-186606/v1), 2021-07-07
Supplement: Supplementary file 1 [file 3c295f41aead3c029ceab1e0.docx]

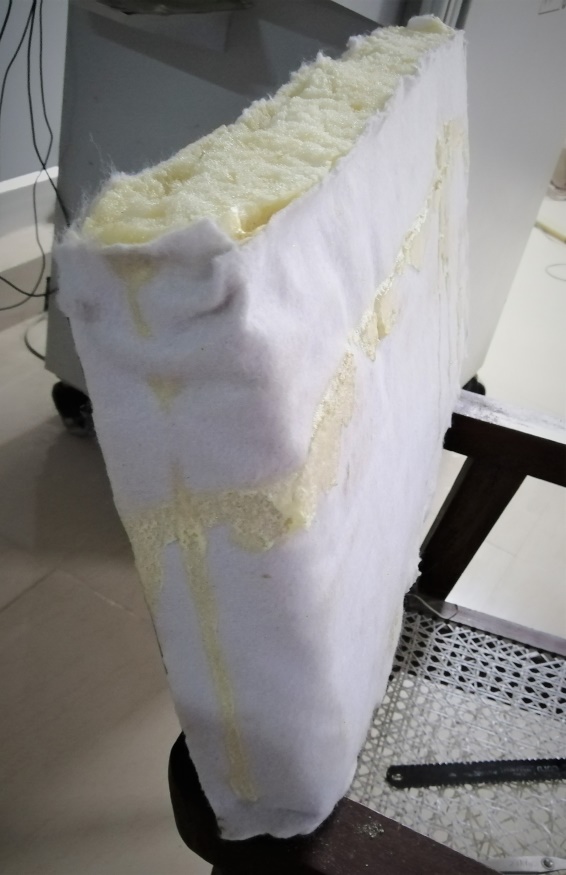


**(c)**

**(b)**

**(a)**

**(a)**

**Supplementary Figure (1):** (a) Plane rectangular isolation curtain made of PU foam; (b) The rectangular isolation curtain installed inside the prepared model ground; (c) The uplift of the isolation curtain observed after 0.1g intensity loading


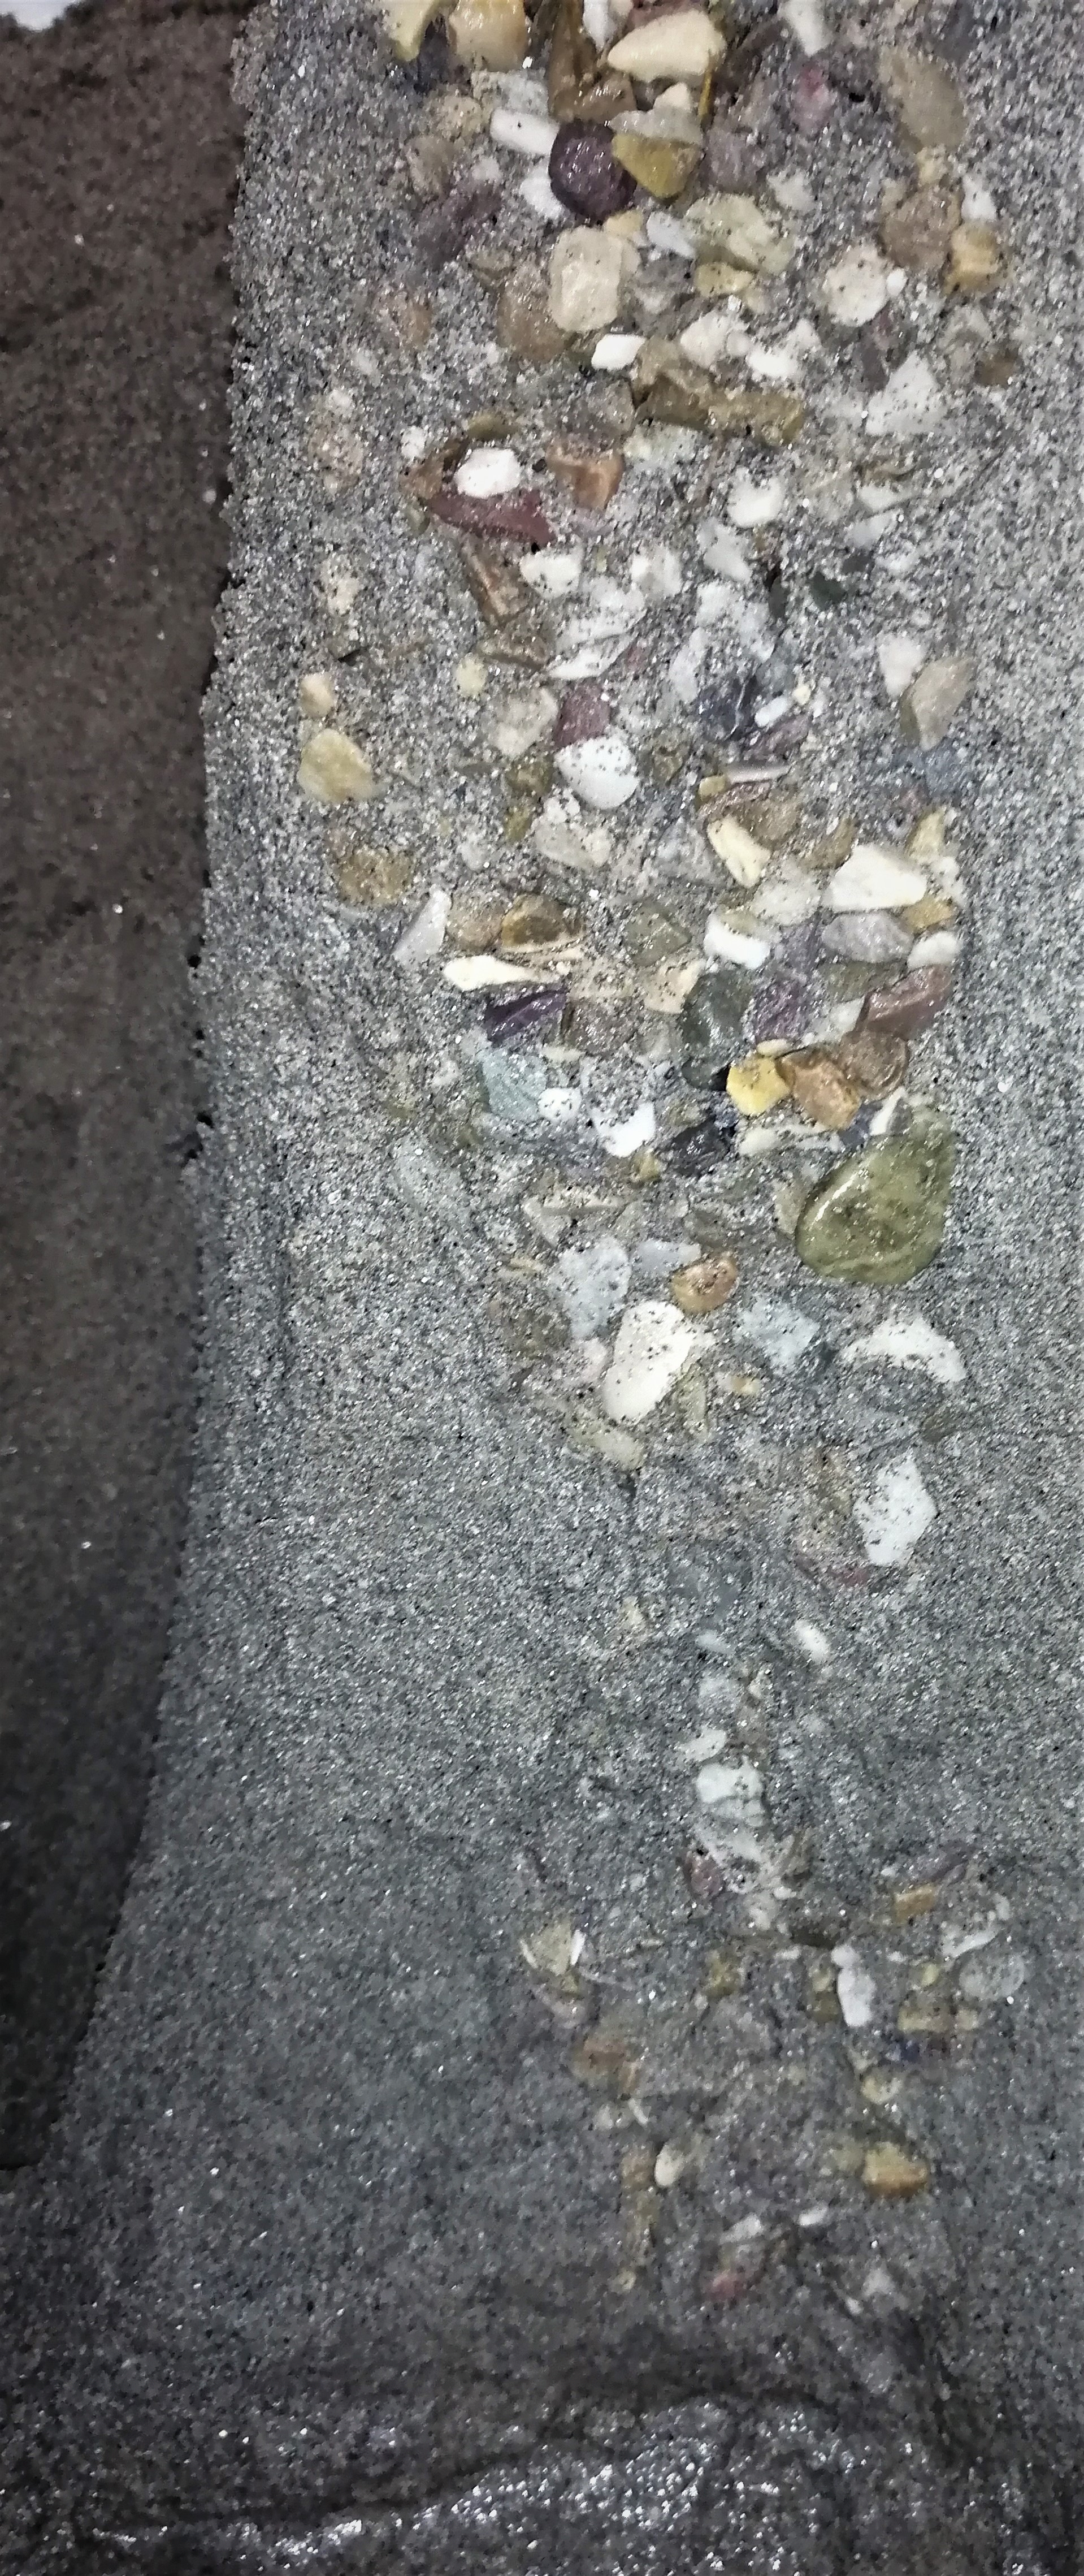


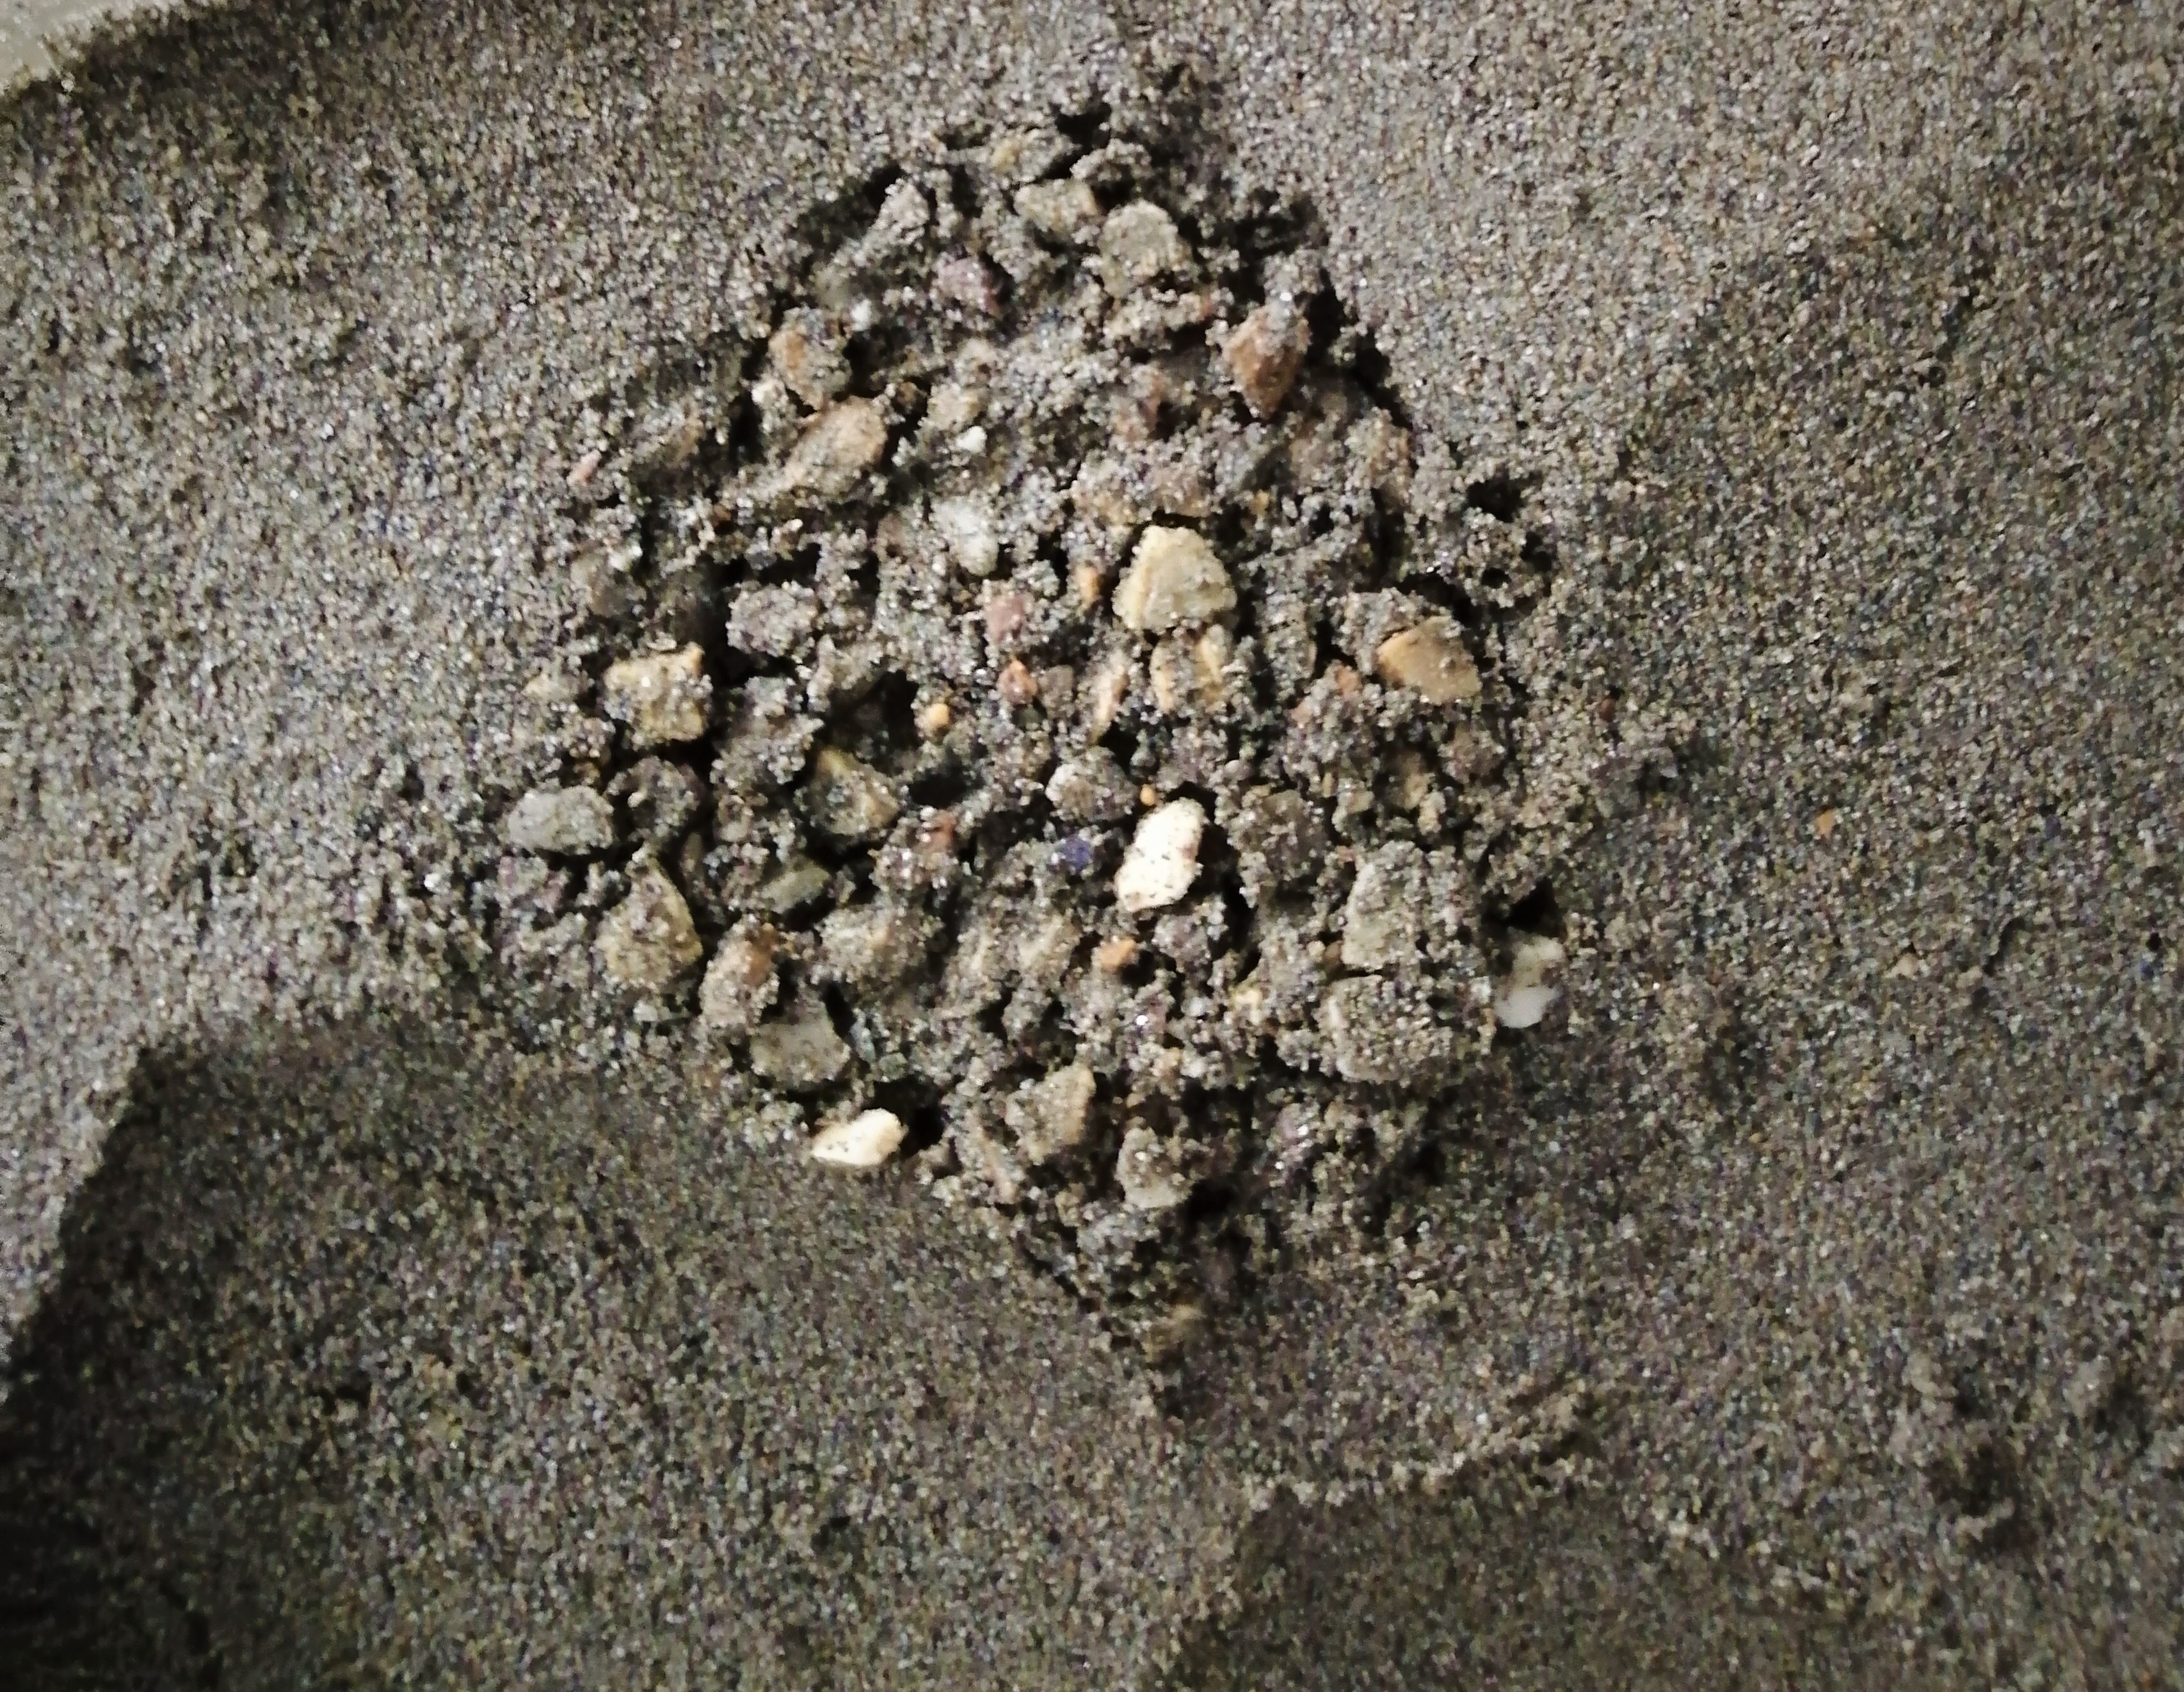


**(a)**

**(b)**

**Supplementary Figure (2):** (a) The clogging observed in stone columns (Top view) during the removal of soil sample (b) The clogging accompanied with bulging of cross sectional area (side view) observed during the removal of soil sample
